# Supplementary material
Source: ML conference proceedings conference paper supplement (https://openaccess.thecvf.com/content/ICCV_2019/html/Gupta_ViCo_Word_Embeddings_ICCV_2019_paper.html)
Supplement: Supplementary file 1 [file Gupta_ViCo_Word_Embeddings_ICCV_2019_supplemental.pdf]

# ViCo: Word Embeddings from Visual Co-occurrences (Supplementary Material)

Tanmay Gupta    Alexander Schwing    Derek Hoiem  
University of Illinois at Urbana Champaign  
{tgupta6, aschwing, dhoiem}@illinois.edu

The supplementary material includes:

1. Supervised Partitioning Analysis (Sec. 1)
2. Performance on all metrics for both unsupervised clustering and supervised partitioning analysis (Tab. 1)
3. Words with coarse and fine annotations used for clustering and partitioning analysis (Tab. 2, Sec. 3).
4. Categories used in the zero-shot analysis (Sec. 3)
5. Why are random vectors competitive with learned embeddings on vision-language tasks? (Sec. 4)

## 1. Supervised Partitioning Analysis

The partitioning analysis characterizes how well word embeddings represent the differences between words belonging to different semantic categories *while* sharing some representation with words in the same category. This is done by measuring the ability of a supervised learning algorithm to partition words into high-level categories at different learning capacities. Specifically, we use a decision tree classifier trained with Gini impurity as the splitting criterion and a minimum of 2 samples per leaf node. We control model capacity through maximum tree depth. We chose decision trees because: (i) they provide a natural way to control model capacity through depth, and (ii) they can hierarchically partition high dimensional spaces based on a label assignment.

For evaluation, in addition to accuracy, we also compute ARI and V-Measure on the induced clustering (words with the same predicted label belong to the same cluster). Note that we do not have a train-test split here since our goal is to study the separability of concepts in the embedding space rather than generalization.

Tab. 1 shows the average performance across tree depth for the 3 metrics. Our main conclusions from the partitioning analysis are as follows:

**ViCo outperforms other embeddings.** *ViCo* embeddings alone are partitioned better than other embeddings. *GloVe+ViCo* yields further improvements.

**Coarse categories well represented in GloVe.** While *GloVe+ViCo* yields significant gains (11 to 27% relative gain) over *GloVe* for fine classes, coarse categories are partitioned quite well with *GloVe* alone and using *ViCo* yields relatively small improvements (3 to 6% relative gain).

## 2. Consistency across tasks and metrics

Tab. 1 shows clustering and partitioning performance for multiple metrics – ARI and V-Measure for clustering, and Accuracy, ARI, and V-Measure for partitioning analysis. Our key conclusions are consistent across both tasks and metrics: (i) *ViCo* clusters words into visual categories better than other embeddings; (ii) Words in the *ViCo* embedding space are easier to partition into visual categories using a supervised learning algorithm; (iii) *GloVe+ViCo* outperforms all embeddings including *GloVe* and *ViCo* individually, showing the complementary nature of information encoded by the two embeddings.

## 3. Words and Categories

Tab. 2 shows the 495 words used in our clustering and partitioning analysis annotated with 13 coarse and 65 fine categories. The words were selected from the list of most frequent words in the VisualGenome [2] dataset, and were annotated manually with coarse and fine categories.

For the zero-shot analysis, we use CIFAR-100 [3]. The 100 categories are grouped into 20 super-categories consisting of 5 categories each. The super-categories are only used for generating the seen/unseen splits as described in the main submission (Sec.4). All categories and super-categories can be found at the original CIFAR-100 website: <https://www.cs.toronto.edu/~kriz/cifar.html>.

## 4. Why are random vectors competitive with learned embeddings?

Random vectors are surprisingly competitive with learned embeddings (both *GloVe* and *ViCo*) on vision-language tasks. Below, we present a hypothesis for this

| Embeddings             | Dim.    | Unsupervised Clustering |             |             |             | Supervised Partitioning |             |             |             |             |             |
|------------------------|---------|-------------------------|-------------|-------------|-------------|-------------------------|-------------|-------------|-------------|-------------|-------------|
|                        |         | Fine                    |             | Coarse      |             | Fine                    |             |             | Coarse      |             |             |
|                        |         | V                       | ARI         | V           | ARI         | V                       | ARI         | Acc.        | V           | ARI         | Acc.        |
| random(100)            | 100     | 0.34                    | 0.00        | 0.15        | 0.00        | 0.55                    | 0.32        | 0.49        | 0.59        | 0.55        | 0.72        |
| GloVe                  | 300     | 0.50                    | 0.15        | 0.52        | 0.38        | 0.70                    | 0.48        | 0.64        | 0.77        | 0.74        | 0.84        |
| GloVe+random(100)      | 300+100 | 0.50                    | 0.14        | 0.49        | 0.35        | 0.70                    | 0.48        | 0.65        | 0.76        | 0.74        | 0.84        |
| vis-w2v-wiki [1]       | 200     | 0.41                    | 0.08        | 0.43        | 0.27        | 0.73                    | 0.52        | 0.67        | 0.77        | 0.74        | 0.84        |
| vis-w2v-coco [1]       | 200     | 0.45                    | 0.08        | 0.4         | 0.22        | 0.72                    | 0.46        | 0.66        | 0.72        | 0.67        | 0.81        |
| GloVe+vis-w2v-wiki     | 300+200 | 0.5                     | 0.14        | 0.52        | 0.4         | 0.72                    | 0.49        | 0.66        | 0.76        | 0.72        | 0.84        |
| GloVe+vis-w2v-coco     | 300+200 | 0.52                    | 0.16        | 0.55        | <b>0.42</b> | 0.74                    | 0.56        | 0.68        | 0.77        | 0.74        | <b>0.85</b> |
| ViCo(linear,100)       | 100     | <b>0.60</b>             | <b>0.21</b> | <b>0.59</b> | 0.36        | <b>0.76</b>             | <b>0.57</b> | <b>0.70</b> | <b>0.78</b> | <b>0.76</b> | <b>0.85</b> |
| GloVe+ViCo(linear,100) | 300+100 | <b>0.61</b>             | <b>0.23</b> | <b>0.65</b> | <b>0.48</b> | <b>0.78</b>             | <b>0.61</b> | <b>0.72</b> | <b>0.81</b> | <b>0.78</b> | <b>0.87</b> |

Table 1: Comparing ViCo to other embeddings on clustering and partitioning tasks. V-Measure for clustering is reported in the main submission. Here we show ARI for clustering, and V-Measure, ARI, and Accuracy for partitioning analysis. Conclusion are consistent across both tasks, and all metrics: (i) ViCo alone outperforms GloVe, random, and vis-w2v on all metrics, and their combinations on all but one metric (clustering ARI on coarse categories where GloVe and GloVe+vis-w2v\* do better); (ii) GloVe+ViCo outperforms all other embeddings including ViCo and GloVe, showing that ViCo and GloVe encode complementary information.

behavior and test the hypothesis on image to caption retrieval task.

**Hypothesis:** Given enough data, vision-language models learn to transform random vectors to get useful intermediate word representations.

**Test:** Fig. 4 shows the performance of random and learned embeddings when trained on different amounts of training data. We see that learned embeddings have a significant advantage over random ones when the model is trained with only 1-2% of the available training data but diminishing gains (green line) are observed with more data.

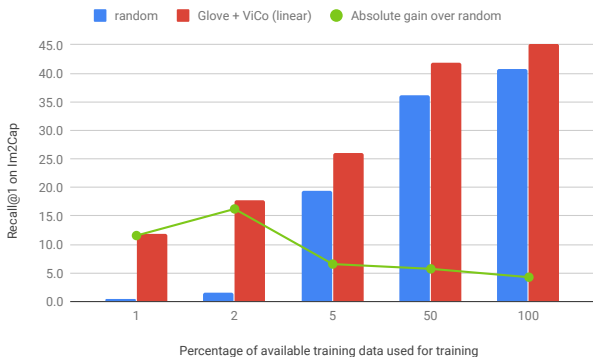

Figure 1. Comparing random and learned embeddings for Im2Cap model trained with varying amounts of data. We report average recall across 3 runs because of variance observed during training.

**Reason for limited improvement of ViCo over Random and GloVe on VQA and Captioning.** Because of the above hypothesis and availability of sufficient training data for

tasks like VQA and Image Captioning, gains due to learned embeddings (for both GloVe and ViCo) are relatively small in comparison to random vectors.

However, we want to emphasize that our clustering, partitioning, and zero-shot analysis, as well as the discriminative attributes task highlight the advantages of learned embeddings over random embeddings, and ViCo over existing word embeddings. Finally, the ability to represent multiple senses of relatedness (Fig. 3 in the main submission) also distinguishes ViCo from existing word embeddings.

## References

- [1] Satwik Kottur, Ramakrishna Vedantam, José M. F. Moura, and Devi Parikh. Visual word2vec (vis-w2v): Learning visually grounded word embeddings using abstract scenes. *CVPR*, 2016. 2
- [2] Ranjay Krishna, Yuke Zhu, Oliver Groth, Justin Johnson, Kenji Hata, Joshua Kravitz, Stephanie Chen, Yannis Kalantidis, Li-Jia Li, David A Shamma, et al. Visual genome: Connecting language and vision using crowdsourced dense image annotations. *IJCV*, 2017. 1
- [3] Alex Krizhevsky and Geoffrey Hinton. Learning multiple layers of features from tiny images. Technical report, Citeseer, 2009. 1

| Coarse Categories | Fine Categories                                                                                                            | Words                                                                                                                                                                                                                                                                                                                                                                                                                                                                                                                                                                                                                                                                                                                                                          |
|-------------------|----------------------------------------------------------------------------------------------------------------------------|----------------------------------------------------------------------------------------------------------------------------------------------------------------------------------------------------------------------------------------------------------------------------------------------------------------------------------------------------------------------------------------------------------------------------------------------------------------------------------------------------------------------------------------------------------------------------------------------------------------------------------------------------------------------------------------------------------------------------------------------------------------|
| food              | dessert<br>drinks<br>fruits<br>herbs<br>meals<br>meats<br>nuts<br>spices<br>vegetarian<br>prepared/dishes<br>miscellaneous | muffin, cake, pancake, sweet, candy, dessert, cupcake, doughnut, pastry, sugar<br>coffee, tea, water, juice, beer, wine, alcohol, drink, milk<br>apple, banana, fruit, pineapple, mango, pear, berry, lime, lemon, peach, plum, date<br>oregano, herb, parsley, basil<br>lunch, meal, breakfast, dinner<br>pepperoni, steak, chicken, meat, pork<br>nut, almond, cashew, pecan, peanut, walnut, hazelnut<br>salt, pepper, spice, chili, garlic, ginger<br>tomato, zucchini, broccoli, vegetable, capsicum, spinach, onion, pea, squash, potato, corn, bean, cabbage, mushroom, carrot<br>dish, chip, tortilla, burger, toast, bagel, pizza, pasta, sauce, salad, bread, pickle, bun, soup, noodle, syrup<br>dough, cheese, food, egg, wheat, rice, butter, oil |
| animals           | birds<br>farm<br>fish<br>pets<br>reptiles<br>wild                                                                          | bird, turkey, owl, sparrow, pigeon, ostrich, duck, goose, swan, gull, flamingo, peacock<br>ox, cow, goat, cattle, bull, lamb, horse, donkey<br>fish, dolphin, shark<br>dog, cat, kitten, puppy<br>snake, reptile, turtle, crocodile, lizard<br>zebra, elephant, giraffe, lion, tiger, monkey, antelope, bear, animal, gazelle                                                                                                                                                                                                                                                                                                                                                                                                                                  |
| colors            | colors                                                                                                                     | red, green, blue, yellow, brown, grey, black, white, orange, purple, pink, cyan, violet, indigo, gold, silver, maroon                                                                                                                                                                                                                                                                                                                                                                                                                                                                                                                                                                                                                                          |
| appliances        | appliances                                                                                                                 | refrigerator, toaster, oven, burner, dishwasher, blender, microwave, oven, stove, appliance, cooler                                                                                                                                                                                                                                                                                                                                                                                                                                                                                                                                                                                                                                                            |
| electronics       | computer<br>display<br>audio<br>communication<br>miscellaneous                                                             | computer, laptop, keyboard, mouse, mousepad, printer<br>monitor, television, tv, display<br>earbud, headphone, speaker, microphone<br>cellphone, phone, antenna, radio, telephone<br>electronic, device, digital, clock, camera, electronics                                                                                                                                                                                                                                                                                                                                                                                                                                                                                                                   |
| utensils          | containers<br>drinks<br>cutlery<br>cooking/brewing                                                                         | cup, bowl, utensil, plate, jar, vase, urn<br>glass, bottle, jug<br>spoon, spatula, fork<br>pan, kettle, teapot, pot                                                                                                                                                                                                                                                                                                                                                                                                                                                                                                                                                                                                                                            |
| transport         | fourwheel<br>twowheel<br>rail<br>water<br>air<br>generic                                                                   | car, bus, minivan, tractor, buggy, van, minivan, jeep<br>scooter, bike, bicycle, motorcycle, moped<br>train, tram, railway, engine<br>boat, ship, kayak<br>aircraft, helicopter, jet, aeroplane, propeller<br>vehicle, transport, cargo                                                                                                                                                                                                                                                                                                                                                                                                                                                                                                                        |
| humans            | profession<br>male<br>female<br>neutral<br>color<br>sport<br>age<br>commute                                                | worker, firefighter, fireman, doctor, soldier, photographer, accountant, referee, student<br>man, male, boy, father<br>female, woman, girl, miss, mother, lady, girl<br>people, person, individual, friend, lodger<br>caucasian, brunet, blonde<br>skier, snowboarderskateboarder<br>young, old, adolescent, teen, teenager, adult, child, baby<br>motorcyclist, cyclist, driver, bicyclist, motorist, pedestrian, rider                                                                                                                                                                                                                                                                                                                                       |
| numbers           | numbers                                                                                                                    | numeral, number, one, two, three, four, five, six, seven, eight, nine, ten                                                                                                                                                                                                                                                                                                                                                                                                                                                                                                                                                                                                                                                                                     |
| clothes           | arms<br>coats<br>full body<br>head<br>legs<br>neck<br>undergarments<br>torso                                               | wristband, mitten, glove, sleeve, watch<br>robe, blazer, jacket, coat<br>dress, apparel, suit, outfit, clothing, uniform, overall, full-dress<br>sunglasses, spectacle, visor, helmet, beanie, cap, hat, headband, bandanna, hood<br>boot, sandal, shoe, slipper, legging, trouser, skirt, sock, jean, hosiery, stocking, pajama<br>bib, tie, scarf, necktie<br>swimsuit, bikini, lingerie, negligee<br>shirt, tshirt, t-shirt, top, blouse, apron, jersey, sweatshirt, sweater, lapel                                                                                                                                                                                                                                                                         |
| construction      | indoors<br>outdoors<br>buildings<br>commercial<br>fixtures<br>furniture                                                    | bedroom, room, stairway, hallway, patio, kitchen, bathroom, railing, balcony, ledge, lounge<br>ledge, balcony, roof, rooftop<br>hotel, hostel, lodge, building, church, barn, shed, restaurant, church, hut<br>booth, stall, market, plaza, shop, shopfront, mall<br>door, window, knob, faucet, lightbulb, bulb, latch, chandelier, fixture, sink, fireplace, bathtub<br>chair, table, countertop, counter, cabinet, desk, bed, bench, cupboard, furniture, bookcase,<br>armchair, sofa, bench, pew, stool, armchair, bookcase, seat, couch                                                                                                                                                                                                                   |
| actions           | actions                                                                                                                    | call, take, step, come, get, bit, rid, throw, catch, enjoy, smile, eat, look, walk, stand, kneel, crouch, bend, talk, leave, construct, make, hit, keep,<br>play, wait, relax, sit, read, serve, fix, lean, leave, kick, squat, bow, swing, get, go, gravel, annoy, rest, put, sleep, catch                                                                                                                                                                                                                                                                                                                                                                                                                                                                    |
| bodyparts         | face<br>hair<br>limbs<br>joints<br>torso<br>extremities<br>non-human                                                       | ear, nose, nostril, head, lip, cheek, face, tongue, tooth, chin, thumb, elbow<br>hair, feather, tuft, eyebrow, brow, mane, eyelash, fur, ponytail, beard<br>leg, arm, foot, thigh, calf, limb<br>knee, wrist, ankle, shoulder<br>thorax, waist, stomach, belly, abdomen, neck, hip<br>fingernail, finger, toe, toenail, hand<br>tail, horn, claw, hoof                                                                                                                                                                                                                                                                                                                                                                                                         |

Table 2: **Words and Categories.** 495 words annotated with 13 coarse and 65 fine categories used in our clustering and partitioning analysis. Words were selected based on their frequency in VisualGenome and manually annotated with categories.
